# Supplementary material for: RNA silencing suppressor-influenced performance of a virus vector delivering both guide RNA and Cas9 for CRISPR gene editing
Source: PubMed Central journal article supplement (PMC7990971; doi:10.1038/s41598-021-85366-4), 2021-03-24

Supplemental Data

Original Images

RNA silencing suppressor-influenced performance of a virus vector delivering  
both guide RNA and Cas9 for CRISPR gene editing

Chiong, Cody and Scholthof

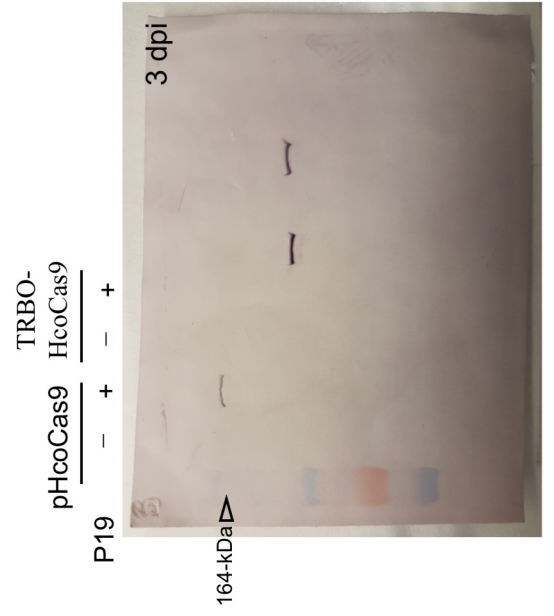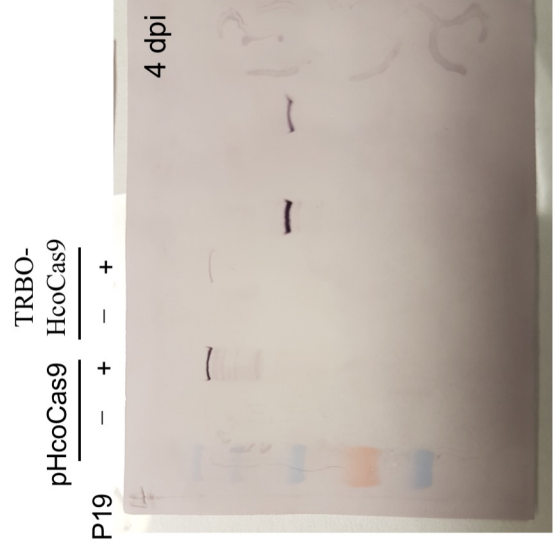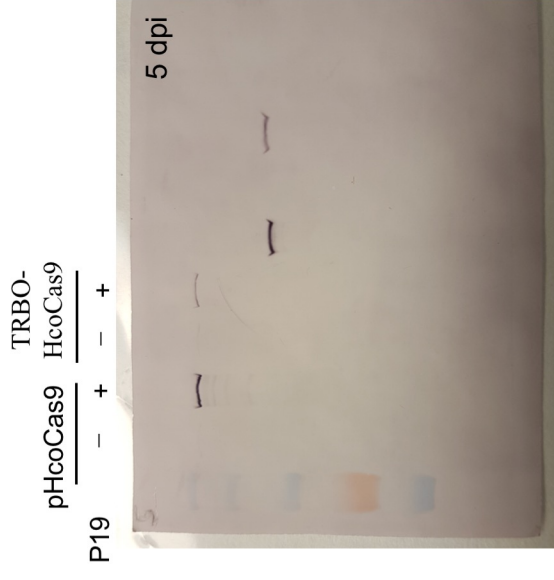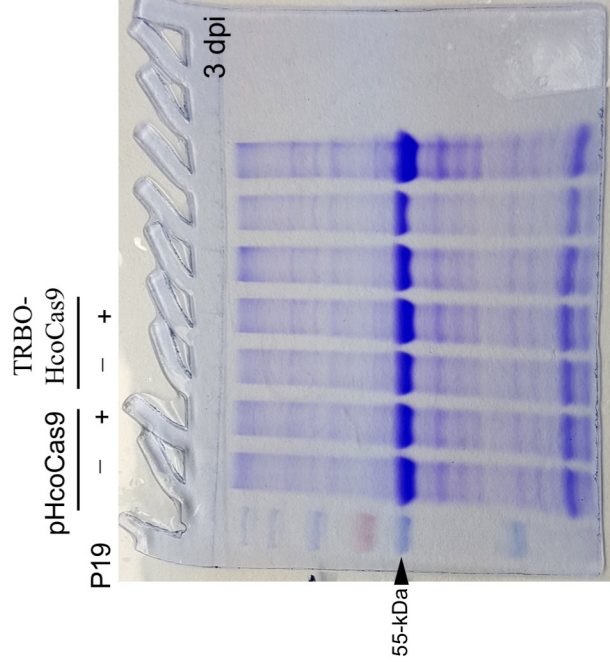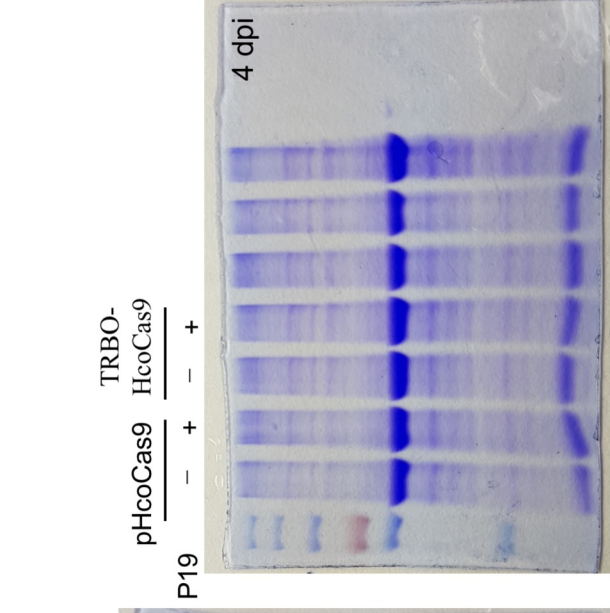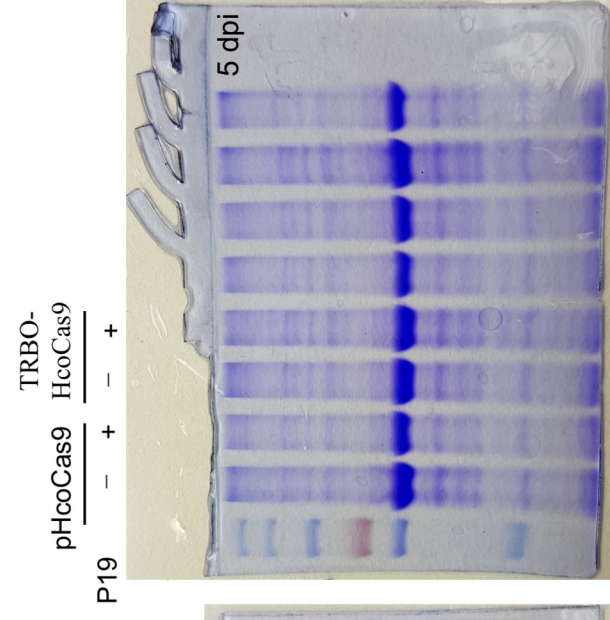

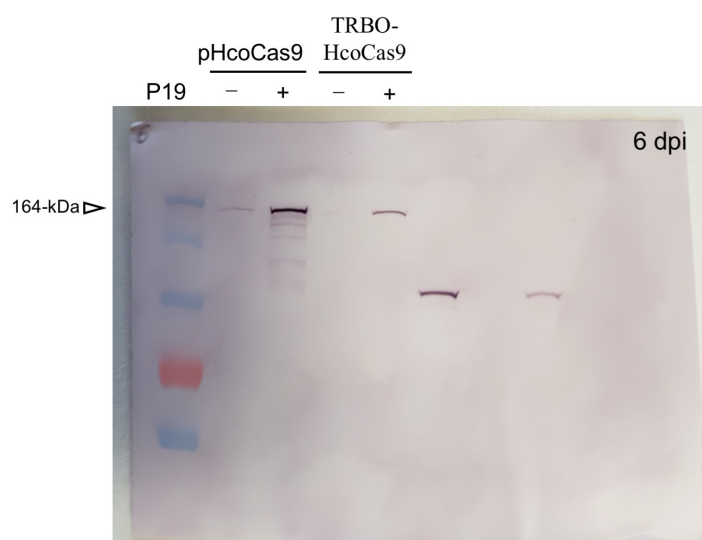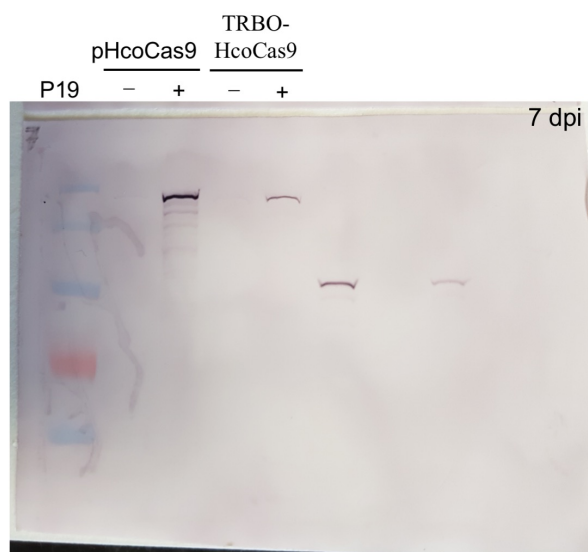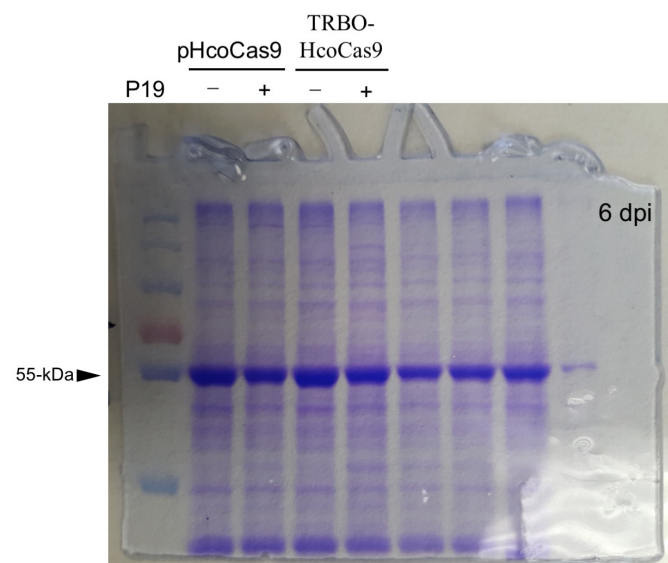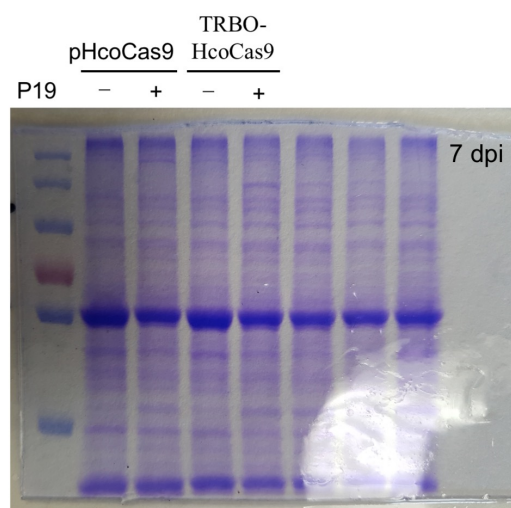

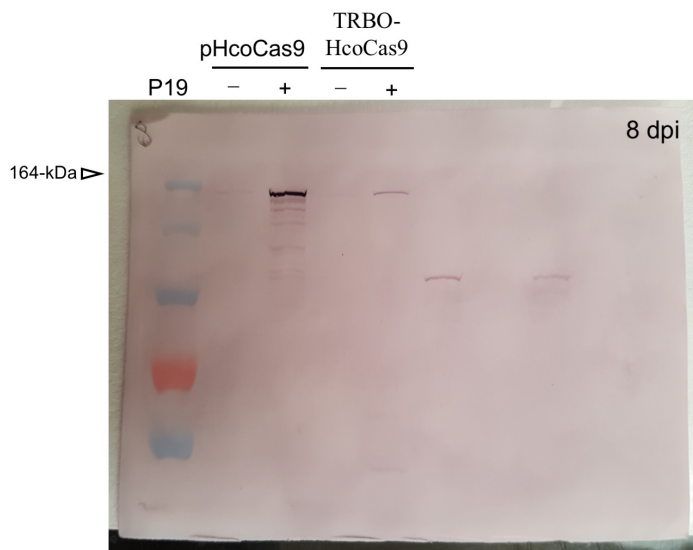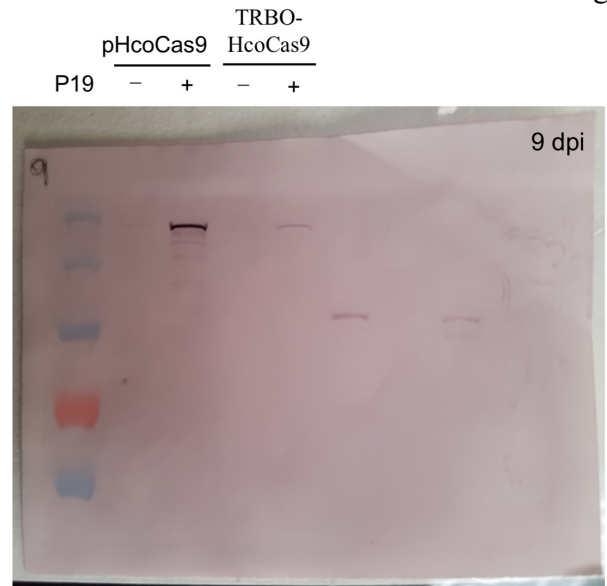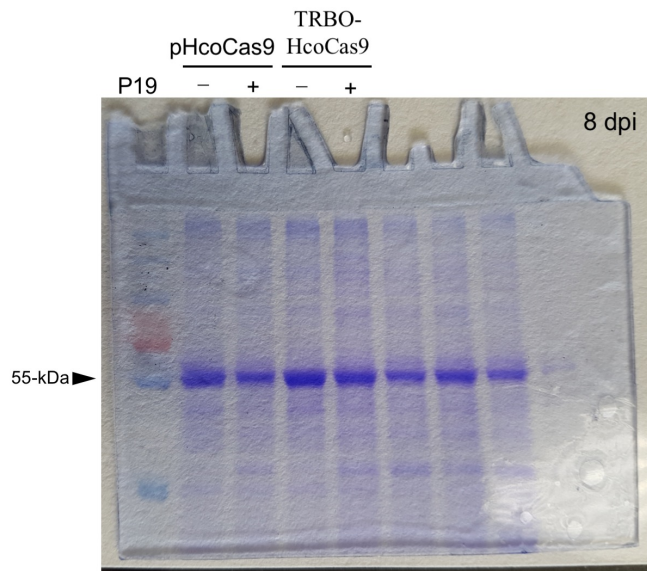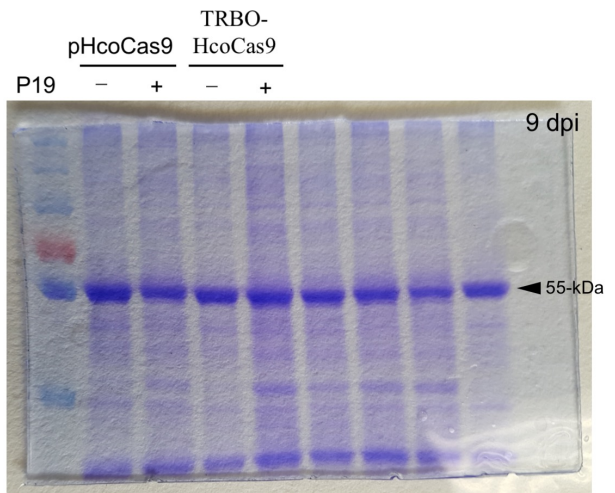

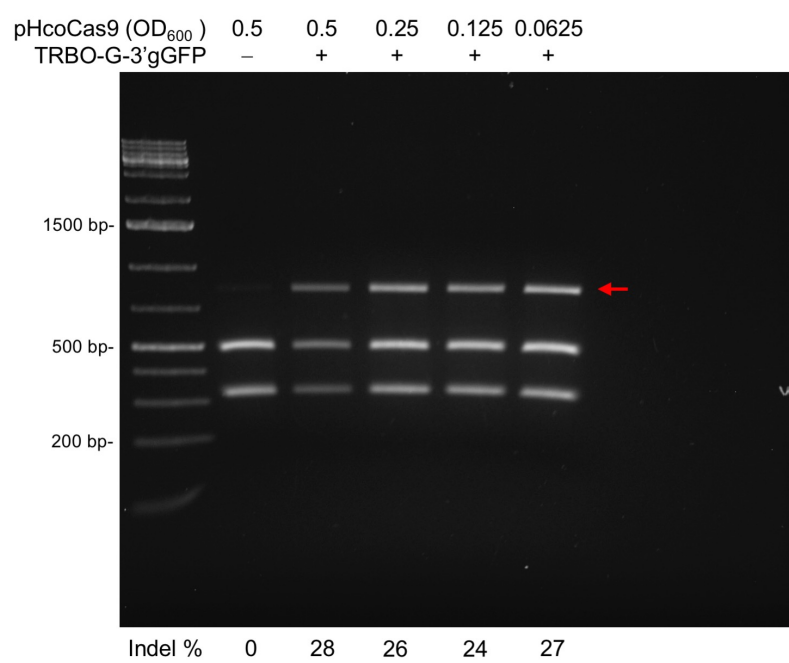

**a**

|                               |     |     |      |       |        |   |
|-------------------------------|-----|-----|------|-------|--------|---|
| pHcoCas9 (OD <sub>600</sub> ) | 0.5 | 0.5 | 0.25 | 0.125 | 0.0625 | - |
| TRBO-G-3'gGFP                 | -   | +   | +    | +     | +      | + |

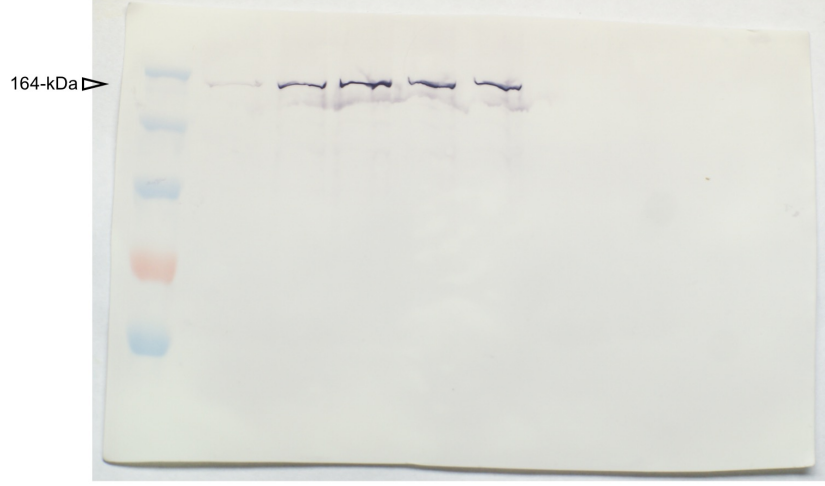

|                               |     |     |      |       |        |   |
|-------------------------------|-----|-----|------|-------|--------|---|
| pHcoCas9 (OD <sub>600</sub> ) | 0.5 | 0.5 | 0.25 | 0.125 | 0.0625 | - |
| TRBO-G-3'gGFP                 | -   | +   | +    | +     | +      | + |

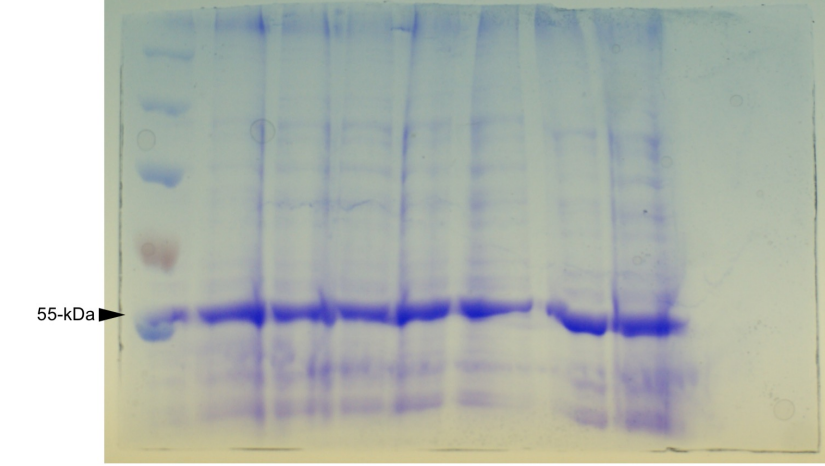

**b**

|     |     |      |       |        |   |                               |
|-----|-----|------|-------|--------|---|-------------------------------|
| 0.5 | 0.5 | 0.25 | 0.125 | 0.0625 | - | pHcoCas9 (OD <sub>600</sub> ) |
| -   | +   | +    | +     | +      | + | RM-gGFP                       |

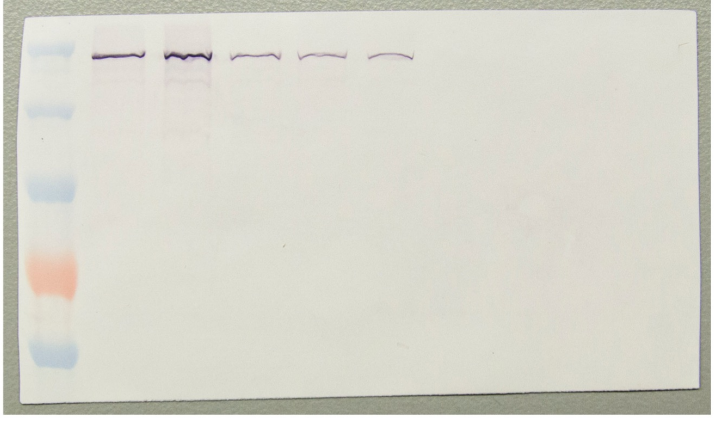

|     |     |      |       |        |   |                               |
|-----|-----|------|-------|--------|---|-------------------------------|
| 0.5 | 0.5 | 0.25 | 0.125 | 0.0625 | - | pHcoCas9 (OD <sub>600</sub> ) |
| -   | +   | +    | +     | +      | + | RM-gGFP                       |

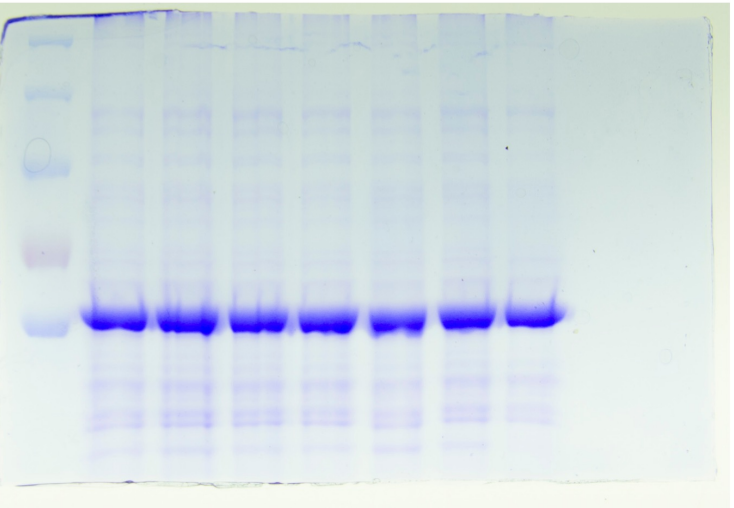

*BsgI* restriction digest

|               |   |   |   |   |   |
|---------------|---|---|---|---|---|
| TRBO-HcoCas9  | + | + | + | - | - |
| pHcoCas9      | - | - | - | + | + |
| TRBO-G-3'gGFP | - | + | + | + | + |
| P19           | - | - | + | - | + |

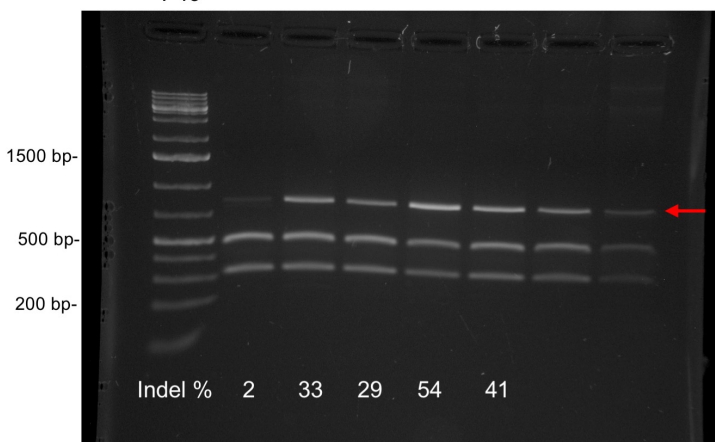

Anti-Cas9

|               |   |   |   |   |   |   |
|---------------|---|---|---|---|---|---|
| TRBO-HcoCas9  | + | + | + | + | - | - |
| pHcoCas9      | - | - | - | - | + | + |
| TRBO-G-3'gGFP | - | - | + | + | + | + |
| P19           | - | + | - | + | - | + |

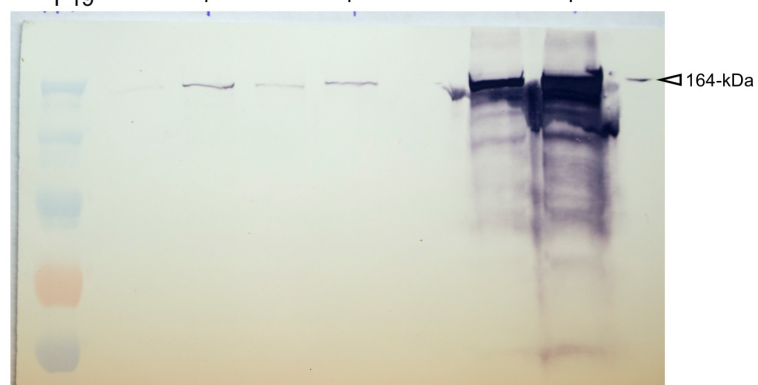

Coomassie blue

|               |   |   |   |   |   |   |
|---------------|---|---|---|---|---|---|
| TRBO-HcoCas9  | + | + | + | + | - | - |
| pHcoCas9      | - | - | - | - | + | + |
| TRBO-G-3'gGFP | - | - | + | + | + | + |
| P19           | - | + | - | + | - | + |

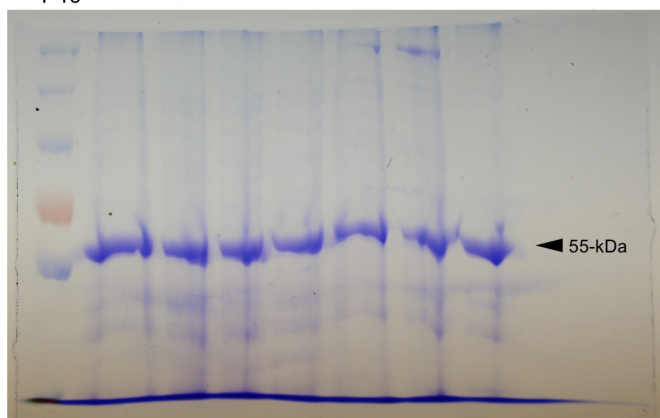

Anti-P19

|               |   |   |   |   |   |   |
|---------------|---|---|---|---|---|---|
| TRBO-HcoCas9  | + | + | + | + | - | - |
| pHcoCas9      | - | - | - | - | + | + |
| TRBO-G-3'gGFP | - | - | + | + | + | + |
| P19           | - | + | - | + | - | + |

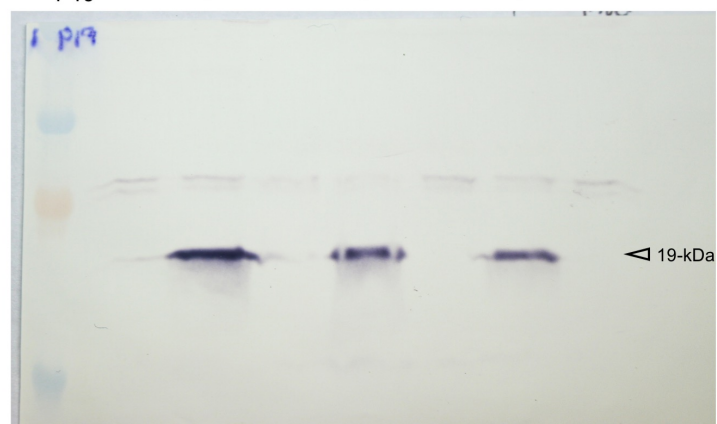

|               | <i>BsgI</i> restriction digest |   |   |   |   |
|---------------|--------------------------------|---|---|---|---|
| TRBO-HcoCas9  | +                              | + | + | - | - |
| pHcoCas9      | -                              | - | - | + | + |
| TRBO-G-3'gGFP | -                              | + | + | + | + |
| P19           | -                              | - | + | - | + |

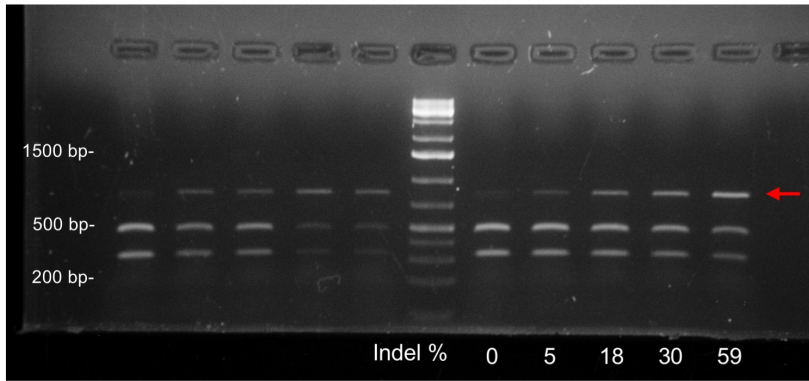

| Anti-Cas9 |   |   |   |   |   |               |
|-----------|---|---|---|---|---|---------------|
| +         | + | + | + | - | - | TRBO-HcoCas9  |
| -         | - | - | - | + | + | pHcoCas9      |
| -         | - | + | + | + | + | TRBO-G-3'gGFP |
| -         | + | - | + | - | + | P19           |

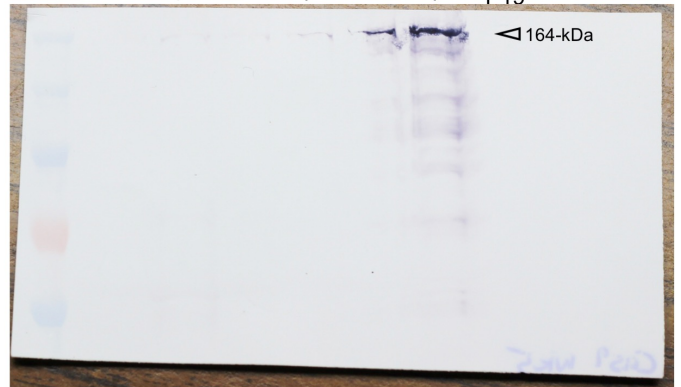

Coomassie blue

|               |   |   |   |   |   |   |
|---------------|---|---|---|---|---|---|
| TRBO-HcoCas9  | + | + | + | + | - | - |
| pHcoCas9      | - | - | - | - | + | + |
| TRBO-G-3'gGFP | - | - | + | + | + | + |
| P19           | - | + | - | + | - | + |

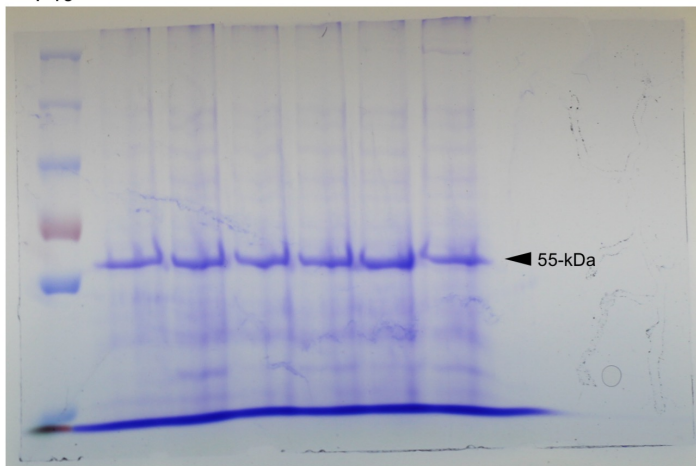

| Anti-P19      |   |   |   |   |   |   |
|---------------|---|---|---|---|---|---|
| TRBO-HcoCas9  | + | + | + | + | - | - |
| pHcoCas9      | - | - | - | - | + | + |
| TRBO-G-3'gGFP | - | - | + | + | + | + |
| P19           | - | + | - | + | - | + |

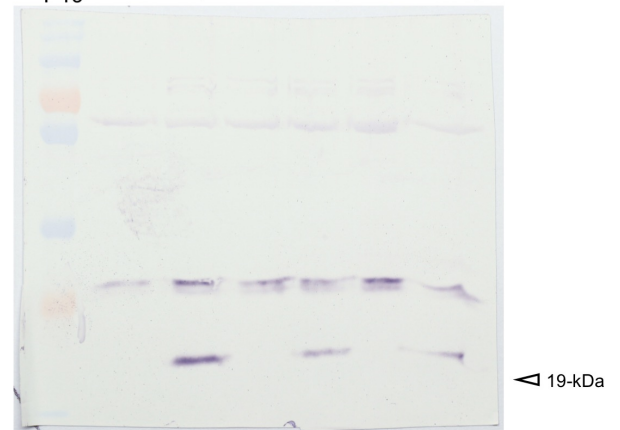



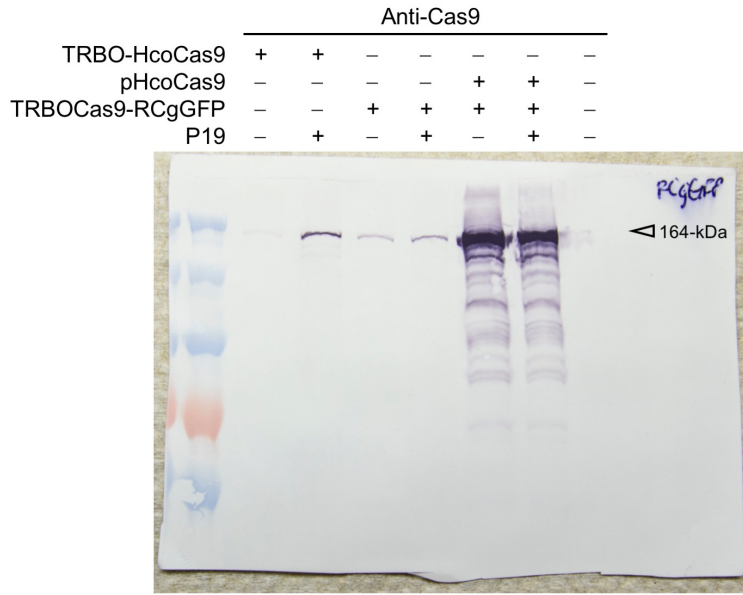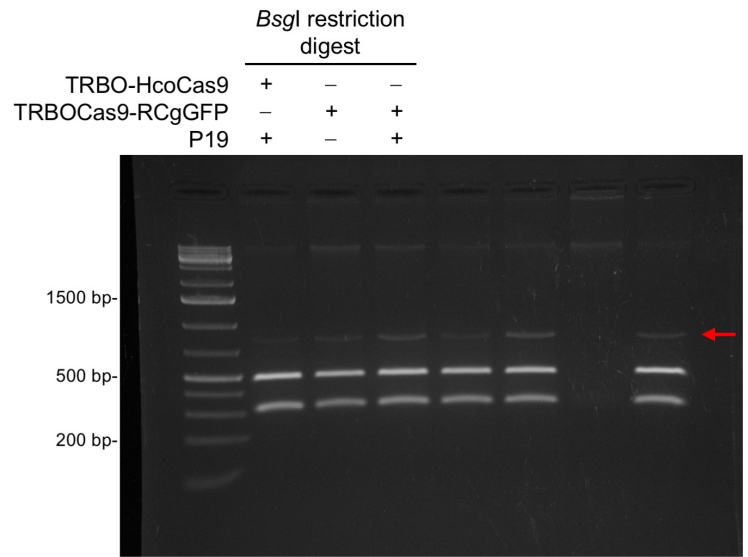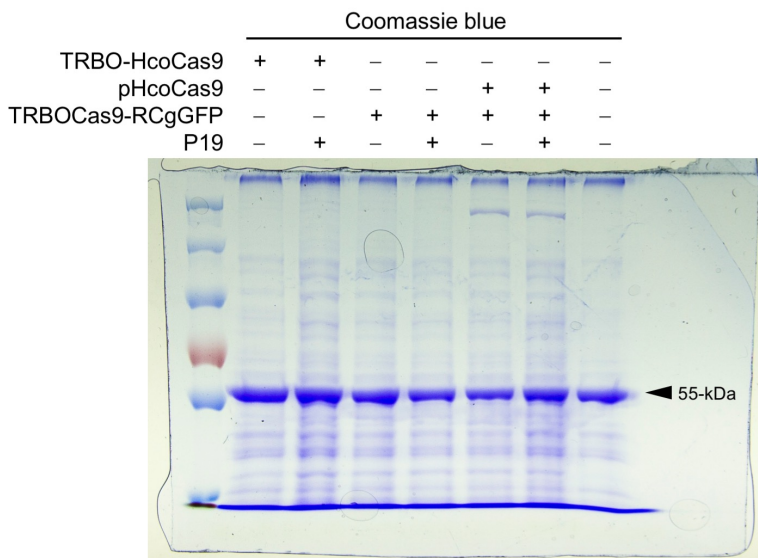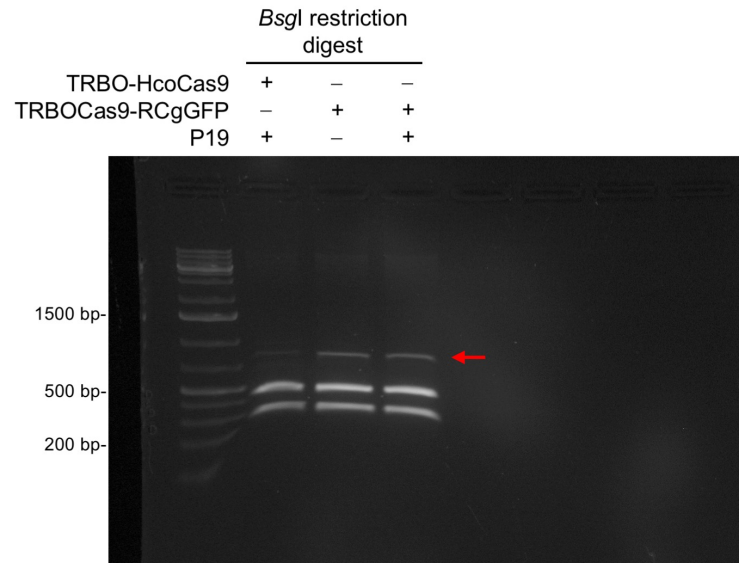

Supplement: 41598_2021_85366_MOESM1_ESM.pdf [file 41598_2021_85366_MOESM1_ESM.pdf]
